# Supplementary material for: Prediction of prognosis and immunotherapy efficacy based on metabolic landscape in lung adenocarcinoma by bulk, single-cell RNA sequencing and Mendelian randomization analyses
Source: publisher site journal article supplement (doi:10.18632/aging.205838), 2024-05-20
Supplement: Supplementary file [file aging-v16i10-205838-supplementary-material-SD1.pdf]

## SUPPLEMENTARY FIGURES

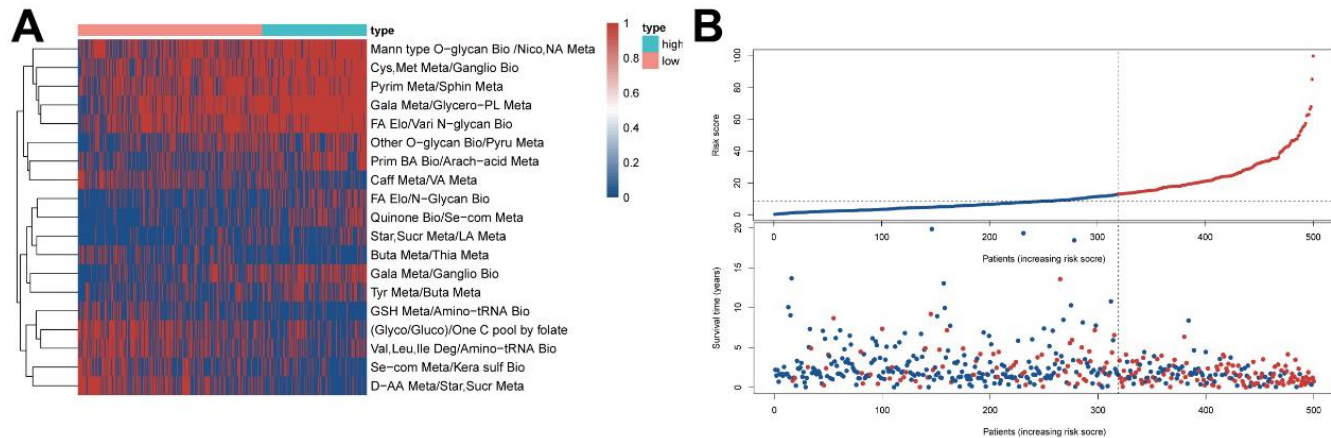

**Supplementary Figure 1. Differences of metabolic pathway pairs, survival time and status between the high- and low-MPPS groups. (A) Differences of 19 metabolic pathway pairs between the high- and low-MPPS groups. (B) The risk plot of MMPS indicated that as MMPS increased, OS time decreased while mortality rose.**

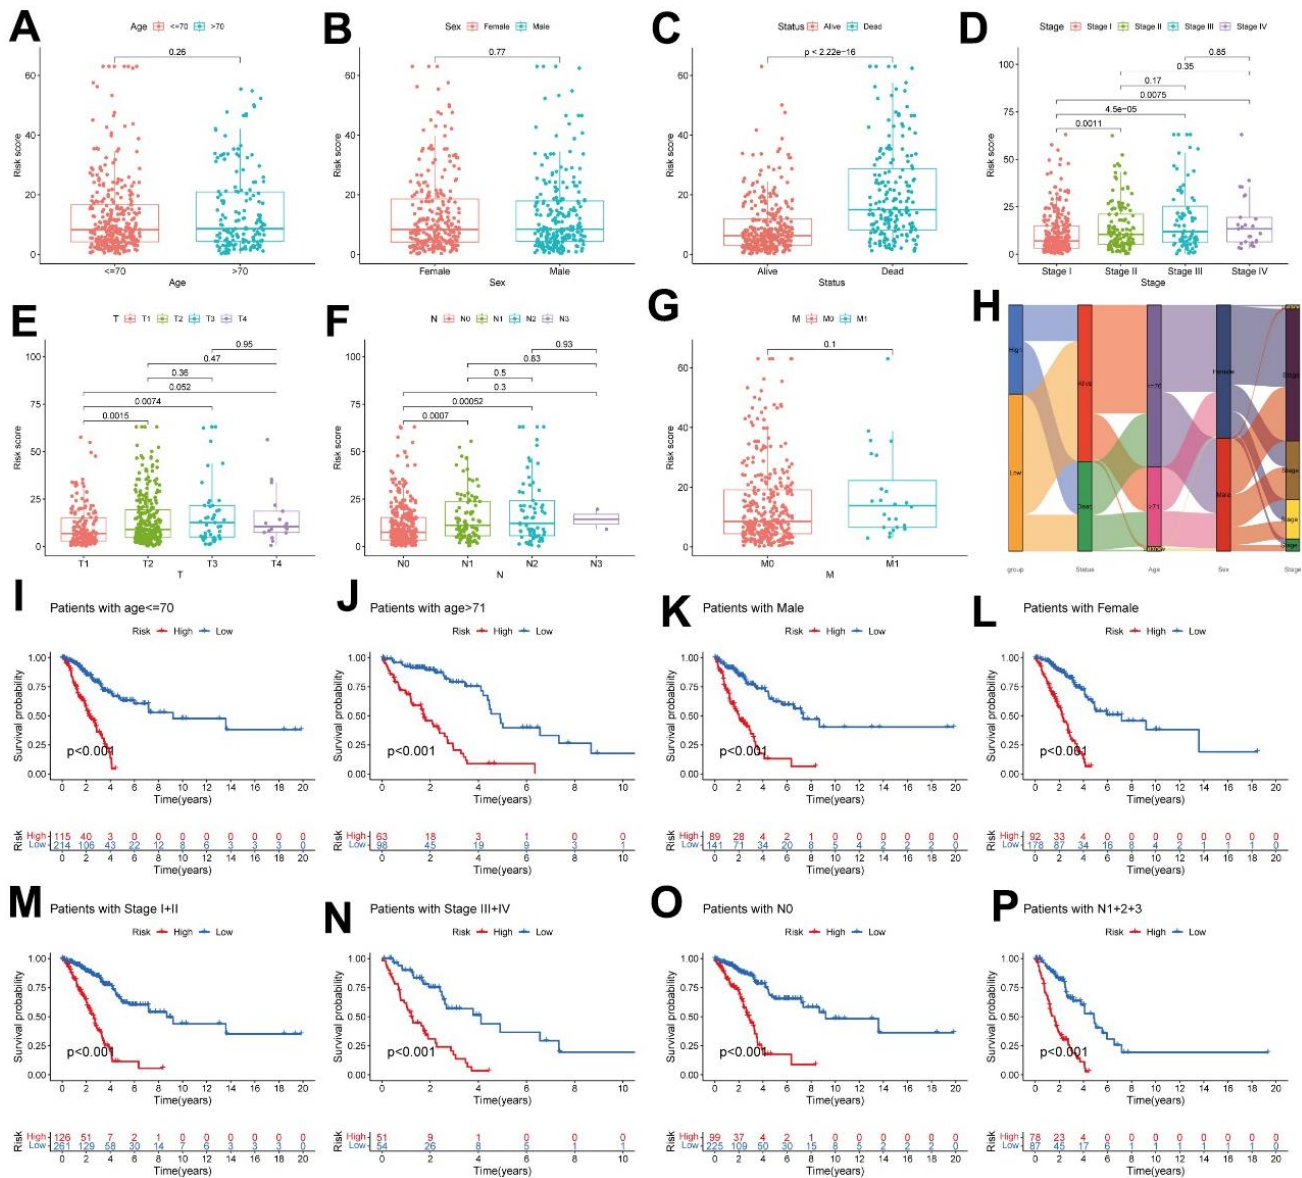

**Supplementary Figure 2. The correlation of MPPS and clinical traits, and its performance in clinical subgroups.** Differences of MPPS between different ages (A), sexes (B), survival status (C), stages (D), T stages (E), N stages (F), and M stages (G). (H) Sankey diagram showed the relationship of MPPS groups, survival status, age, sex, and stage. The Kaplan-Meier survival curves of the high- and low-MPPS groups in different clinical subgroups. Age <= 70 (I), Age > 70 (J), Male (K), Female (L), Stage I+II (M), Stage III+IV (N), N0 stage (O), N1+N2+N3 stage (P).

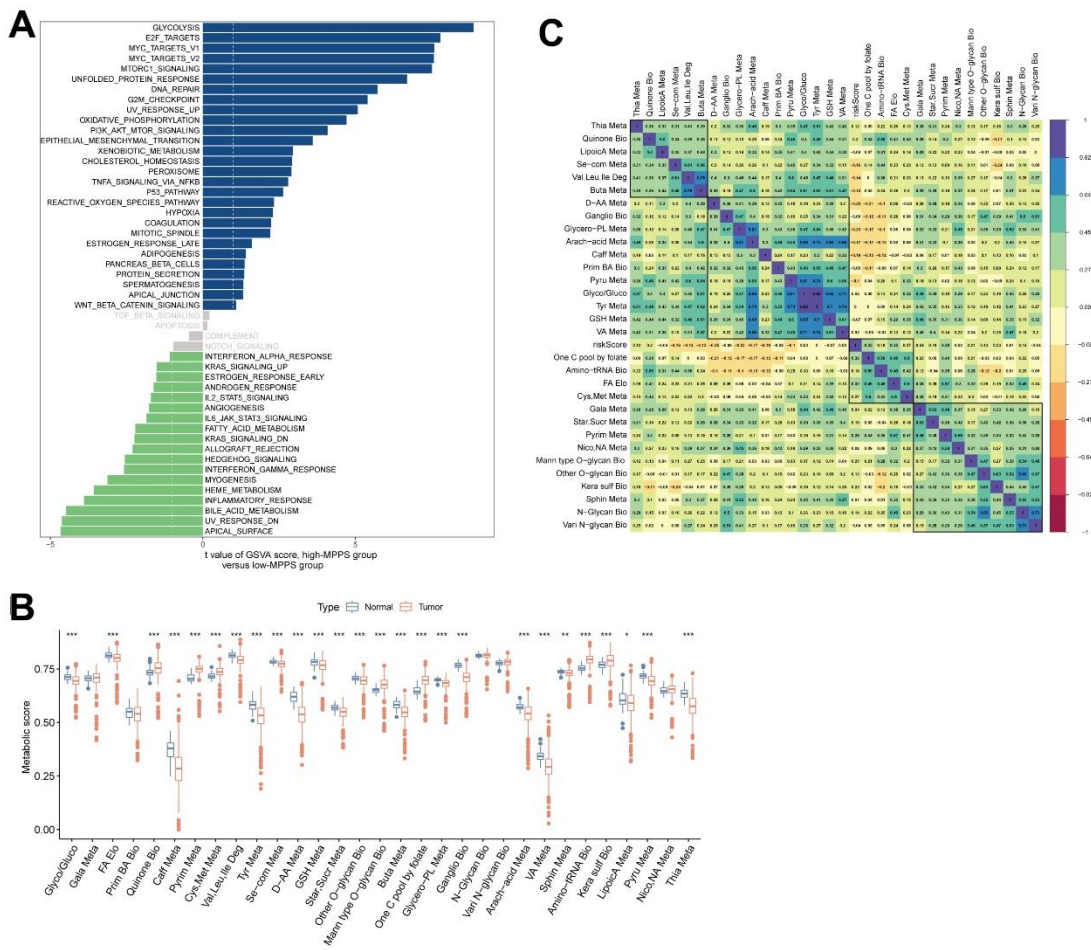

**Supplementary Figure 3. The hallmarks enrichment and metabolic pathways variation between the high- and low-MPPS groups. (A)** The hallmarks enrichment between the high- and low-MPPS groups. **(B)** The differences of metabolic pathways between TCGA-LUAD and normal tissues. **(C)** The correlation heatmap of MPPS and metabolic pathways. \* $P < 0.05$ , \*\* $P < 0.01$ , \*\*\* $P < 0.001$ .

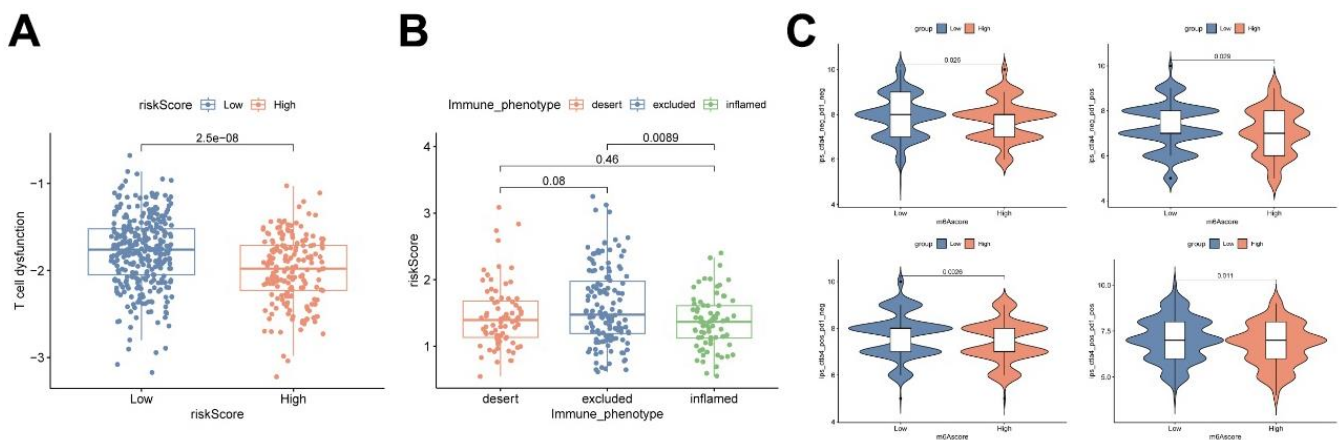

**Supplementary Figure 4. TIDE scores and IPS of the high- and low-MPPS groups. (A)** T cell dysfunction scores of the high- and low-MPPS groups. **(B)** MPPS of desert, excluded, inflamed immune phenotypes. **(C)** IPS of the high- and low-MPPS groups.

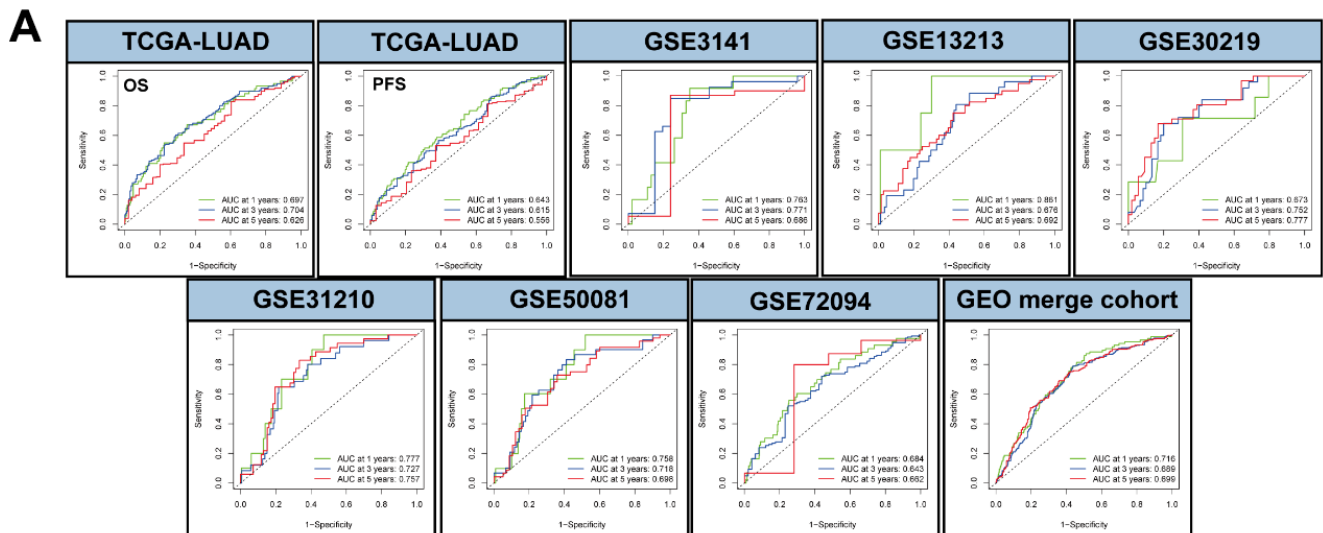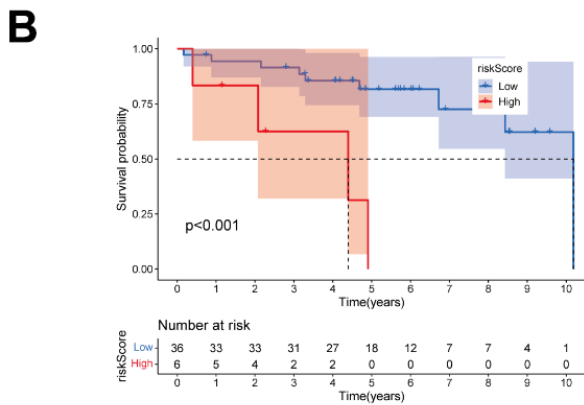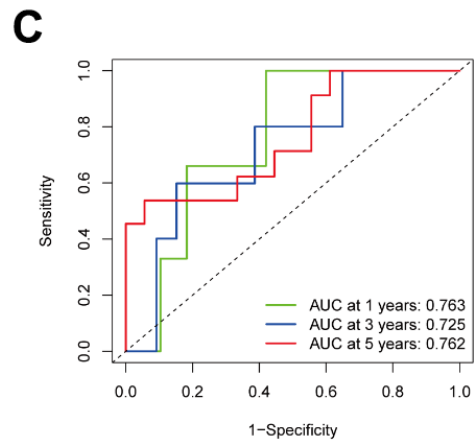

**Supplementary Figure 5. Evaluation of MPPS-related gene signature.** (A) The 1-, 3-, 5-year ROC curves of MPPS-related gene signature in the training and validation cohorts. (B) The Kaplan-Meier survival curves of the high- and low-gene risk score groups in 42 LUAD patients by qRT-PCR. (C) The 1-, 3-, 5-year ROC curves of OS of 42 LUAD patients predicted by MPPS-related gene signature.

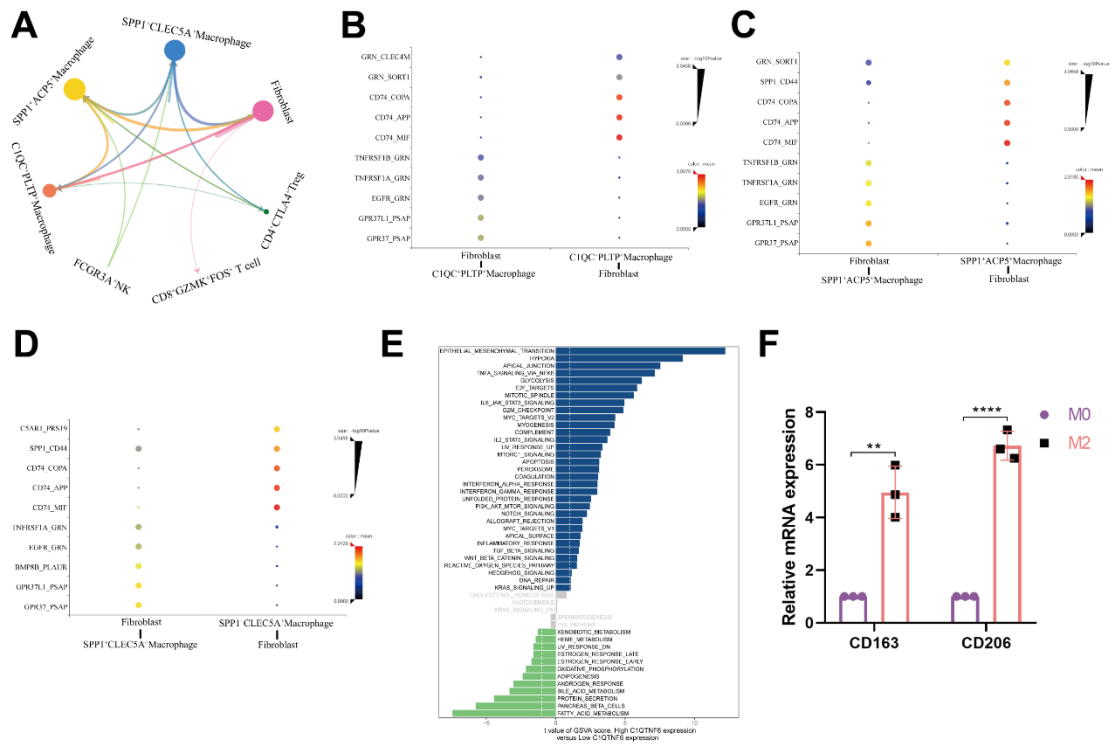

**Supplementary Figure 6. Intercellular communications between fibroblasts and immune cells in LUAD TME.** (A) Intercellular communications network of fibroblasts and immune cells in LUAD TME. (B–D) The ligand-receptor interaction between fibroblasts and M2 macrophages. (E) The hallmarks enrichment between the high- and low-C1QTNF6 expression groups in TCGA-LUAD. (F) M2 macrophage markers expression of induced M0 and M2 macrophages by qRT-PCR.

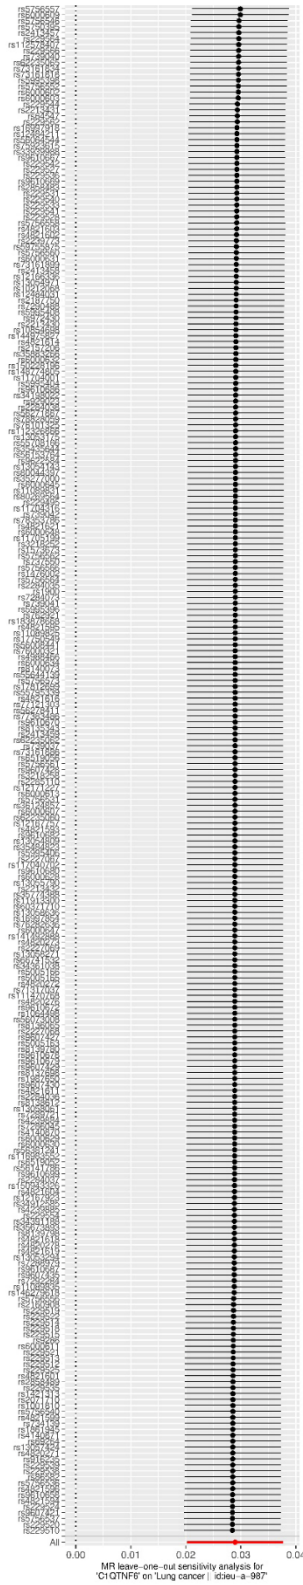

Supplementary Figure 7. Leave-one-out sensitivity analysis of instrumental variables for C1QTNF6.
