# Supplementary material for: Prediction of prognosis and immunotherapy efficacy based on metabolic landscape in lung adenocarcinoma by bulk, single-cell RNA sequencing and Mendelian randomization analyses
Source: publisher site journal article supplement (doi:10.18632/aging.205838), 2024-05-20
Supplement: Supplementary file [file aging-v16i10-205838-supplementary-material-SD2.pdf]

## SUPPLEMENTARY TABLES

**Supplementary Table 1. The clinical information data of LAUD patients from TCGA and GEO databases.**

| <b>Variables</b>            | <b>Discovery cohort<br/>TCGA (500)</b> | <b>Validation cohort<br/>GEO (1009)</b> |
|-----------------------------|----------------------------------------|-----------------------------------------|
| <b>Gender</b>               |                                        |                                         |
| Male                        | 230 (54.00%)                           | 471 (46.70%)                            |
| Female                      | 270 (46.00%)                           | 480 (47.60%)                            |
| NA                          | -                                      | 58 (5.70%)                              |
| <b>Age at Diagnosis</b>     |                                        |                                         |
| Mean (SD)                   | 65.26 (10.05)                          | 64.62 (10.11)                           |
| <b>Median Survival Time</b> |                                        |                                         |
| OS, Days (IQR)              | 654.50 (707)                           | 1114 (1172)                             |
| <b>Survival Event</b>       |                                        |                                         |
| Alive                       | 318 (63.60%)                           | 686 (68.00%)                            |
| Dead                        | 182 (36.40%)                           | 323 (32.00%)                            |
| <b>Stage</b>                |                                        |                                         |
| I                           | 266 (53.20%)                           | 593 (58.80%)                            |
| II                          | 119 (23.80%)                           | 173 (17.10%)                            |
| III                         | 81 (16.20%)                            | 82 (8.10%)                              |
| IV                          | 26 (5.20%)                             | 15 (1.50%)                              |
| NA                          | 8 (1.60%)                              | 146 (14.50%)                            |

SD, standard deviation; IQR, inter-quartile range.
