# Supplementary material for: Prediction of prognosis and immunotherapy efficacy based on metabolic landscape in lung adenocarcinoma by bulk, single-cell RNA sequencing and Mendelian randomization analyses
Source: publisher site journal article supplement (doi:10.18632/aging.205838), 2024-05-20
Supplement: Supplementary file [file aging-v16i10-205838-supplementary-material-SD4.pdf]

**Supplementary Table 3. The list of primers used in this study.**

| <b>Gene</b> | <b>Forward primer (5'-3')</b> | <b>Reverse primer (5'-3')</b> |
|-------------|-------------------------------|-------------------------------|
| C1QTNF6     | CACCATCCTGAAGGGTGACA          | AGACCCTTTCGAAGAGCAGC          |
| ECT2        | ACCCCTAACAGCAATCGCAA          | CAAGACTTTGGGGTGTCTCCA         |
| SLC2A1      | TGGCATCAACGCTGTCTTCT          | CTAGCGCGATGGTCATGAGT          |
| ANLN        | CGCCTCAGACTCCTGGTTTT          | GCTCCAGCAGTTTCTCCGTA          |
| GAPDH       | GGGAGCCAAAAGGGTCATCA          | GCATGGACTGTGGTCATGAGT         |
| LDHA        | GCCGTCTTAATTTGGTCCAGC         | ACTCCATACAGGCACACTGG          |
| KRT8        | ATCAACAACCTTAGGCGGCA          | AGCTCCCGGATCTCCTCTTC          |
| CD80        | ATCACCATCCAAGTGTCACATCCTC     | AGAAACATTGTGACCACAGGACAG      |
| CD86        | TGGCCTAGGGTACAGGCAACA         | GCCCAGATAGAAGTGGCTCCAG        |
| CD163       | AAAAAGCCACAACAGGTCGC          | CTTAAAGGCTGAACTCACTGGG        |
| CD206       | GGGAAAGGTTACCCTGGTG           | TCAAGGAAGGGTCGGATCGT          |
| CD274       | TCCTTGCGGATTATTTCCATGTC       | GCCGACTACAAGCGAATTAC          |
| 18S(rRNA)   | AAACGGCTACCACATCCAAG          | CCTCCAATGGATCCTCGTTA          |
